# Supplementary material
Source: Copernicus journal article supplement (doi:10.5194/bg-23-3195-2026)
Supplement: Supplementary file 1 [file bg-23-3195-2026-supplement.pdf]

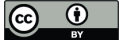

*Supplement of*

## **Deconvolving the biogeochemical controls on coral Sr / Ca and Ba / Ca proxies: new perspectives from paired stable Ca, Sr and Ba isotope compositions**

**Yang Yu et al.**

*Correspondence to:* Yang Yu (yy81@st-andrews.ac.uk)

The copyright of individual parts of the supplement might differ from the article licence.

**Table S1: Coral geochemical data.**

| <b>SST</b><br>°C | <b>Age model</b> | <b>Sr/Ca</b><br>mmol/mol | <b>Ba/Ca</b><br>umol/mol | $\delta^{13}\text{C}$<br>‰ | $\delta^{44/42}\text{Ca}$<br>‰ | $\delta^{88/86}\text{Sr}$<br>‰ | $\delta^{138/134}\text{Ba}$<br>‰ |
|------------------|------------------|--------------------------|--------------------------|----------------------------|--------------------------------|--------------------------------|----------------------------------|
| 24.45            | 01/01/2004       | 9.19                     | 4.838                    |                            |                                |                                |                                  |
| 24.69            | 16/02/2004       | 9.18                     | 4.578                    |                            |                                |                                |                                  |
| 27.32            | 01/04/2004       | 9.03                     | 4.525                    |                            |                                |                                |                                  |
| 29.51            | 17/05/2004       | 8.98                     | 4.421                    |                            |                                |                                |                                  |
| 29.55            | 01/07/2004       | 8.96                     | 4.486                    |                            |                                |                                |                                  |
| 29.17            | 17/08/2004       | 8.99                     | 4.441                    |                            |                                |                                |                                  |
| 28.18            | 01/10/2004       | 8.98                     | 4.396                    |                            |                                |                                |                                  |
| 26.64            | 16/11/2004       | 9.00                     | 4.359                    |                            |                                |                                |                                  |
| 24.56            | 01/01/2005       | 9.13                     | 4.720                    |                            |                                |                                |                                  |
| 24.67            | 28/01/2005       | 9.06                     | 4.535                    |                            |                                |                                |                                  |
| 25.48            | 22/02/2005       | 9.05                     | 4.676                    |                            |                                |                                |                                  |
| 26.77            | 20/03/2005       | 9.06                     | 4.670                    |                            |                                |                                |                                  |
| 28.31            | 15/04/2005       | 9.06                     | 4.676                    |                            |                                |                                |                                  |
| 29.33            | 11/05/2005       | 8.96                     | 4.428                    |                            |                                |                                |                                  |
| 29.59            | 07/06/2005       | 8.93                     | 4.547                    |                            |                                |                                |                                  |
| 29.64            | 03/07/2005       | 8.97                     | 4.380                    |                            |                                |                                |                                  |
| 29.42            | 30/07/2005       | 8.97                     | 4.542                    |                            |                                |                                |                                  |
| 28.70            | 26/08/2005       | 9.00                     | 4.532                    |                            |                                |                                |                                  |
| 27.59            | 21/09/2005       | 9.02                     | 4.460                    |                            |                                |                                |                                  |
| 26.21            | 18/10/2005       | 9.06                     | 4.659                    |                            |                                |                                |                                  |
| 24.79            | 13/11/2005       | 9.12                     | 4.657                    |                            |                                |                                |                                  |
| 23.83            | 09/12/2005       | 9.15                     | 4.666                    |                            |                                |                                |                                  |
| 23.73            | 05/01/2006       | 9.18                     | 4.611                    |                            |                                |                                |                                  |
| 24.93            | 01/02/2006       | 9.09                     | 4.562                    |                            |                                |                                |                                  |
| 27.35            | 01/03/2006       | 9.02                     | 4.355                    |                            |                                |                                |                                  |
| 29.10            | 01/04/2006       | 8.97                     | 4.320                    |                            |                                |                                |                                  |
| 29.36            | 01/05/2006       | 8.99                     | 4.270                    |                            |                                |                                |                                  |
| 29.31            | 01/06/2006       | 8.97                     | 4.171                    |                            |                                |                                |                                  |
| 29.51            | 01/07/2006       | 8.98                     | 4.252                    |                            |                                |                                |                                  |
| 29.19            | 01/08/2006       | 9.02                     | 4.291                    |                            |                                |                                |                                  |
| 27.52            | 01/09/2006       | 9.09                     | 4.511                    |                            |                                |                                |                                  |
| 26.66            | 01/10/2006       | 9.13                     | 4.510                    |                            |                                |                                |                                  |
| 24.78            | 01/11/2006       | 9.16                     | 4.628                    |                            |                                |                                |                                  |
| 23.30            | 01/12/2006       | 9.19                     | 4.737                    | -2.48                      |                                |                                |                                  |
| 24.10            | 01/01/2007       | 9.16                     | 4.526                    | -2.30                      |                                |                                |                                  |
| 24.87            | 04/02/2007       | 9.11                     | 4.491                    | -2.18                      |                                |                                |                                  |
| 27.32            | 07/03/2007       | 9.05                     | 4.460                    | -2.11                      | 0.34                           | 0.21                           | 0.40                             |
| 29.09            | 09/04/2007       | 9.00                     | 4.304                    | -2.19                      | 0.35                           | 0.19                           | 0.39                             |
| 29.38            | 12/05/2007       | 9.02                     | 4.358                    | -2.20                      | 0.42                           | 0.20                           | 0.39                             |

|       |            |      |       |       |      |      |      |
|-------|------------|------|-------|-------|------|------|------|
| 29.26 | 15/06/2007 | 9.01 | 4.454 | -2.24 | 0.39 | 0.19 | 0.40 |
| 29.09 | 18/07/2007 | 9.04 | 4.458 | -2.37 | 0.38 | 0.19 | 0.38 |
| 28.13 | 21/08/2007 | 9.06 | 4.596 | -2.45 | 0.40 | 0.20 | 0.38 |
| 27.06 | 23/09/2007 | 9.09 | 4.720 | -2.51 | 0.44 | 0.20 | 0.38 |
| 24.98 | 26/10/2007 | 9.14 | 4.797 | -2.61 | 0.42 | 0.21 | 0.40 |
| 23.78 | 28/11/2007 | 9.19 | 4.789 | -2.43 | 0.42 | 0.20 | 0.39 |
| 24.08 | 01/01/2008 | 9.18 | 4.655 | -2.26 | 0.43 | 0.21 | 0.41 |
| 25.95 | 06/02/2008 | 9.08 | 4.551 | -2.10 | 0.38 | 0.18 | 0.40 |
| 28.10 | 12/03/2008 | 9.01 | 4.441 | -2.11 | 0.38 | 0.20 | 0.39 |
| 29.03 | 17/04/2008 | 9.02 | 4.384 | -2.12 | 0.38 | 0.19 | 0.37 |
| 29.40 | 24/05/2008 | 9.01 | 4.240 | -2.08 | 0.39 | 0.16 | 0.41 |
| 29.23 | 28/06/2008 | 9.05 | 4.360 | -2.11 | 0.40 | 0.16 | 0.39 |
| 28.70 | 04/08/2008 | 9.11 | 4.451 | -2.20 | 0.34 | 0.18 | 0.38 |
| 27.48 | 09/09/2008 | 9.11 | 4.724 | -2.12 | 0.36 | 0.18 | 0.39 |
| 26.08 | 15/10/2008 | 9.15 | 4.738 | -2.38 | 0.39 | 0.19 | 0.39 |
| 24.52 | 20/11/2008 | 9.25 | 4.783 | -2.17 | 0.40 | 0.21 | 0.38 |
| 24.19 | 26/12/2008 | 9.27 | 4.622 | -2.01 | 0.42 | 0.20 | 0.38 |
| 25.67 | 01/02/2009 | 9.19 | 4.564 | -1.99 | 0.40 | 0.21 | 0.41 |
| 27.46 | 04/03/2009 | 9.11 | 4.497 | -2.00 | 0.40 | 0.21 | 0.39 |
| 29.25 | 06/04/2009 | 9.01 | 4.359 | -2.02 | 0.40 | 0.20 | 0.39 |
| 29.77 | 09/05/2009 | 8.99 | 4.392 | -1.99 | 0.36 |      | 0.39 |
| 29.57 | 12/06/2009 | 8.97 | 4.405 | -1.86 |      |      |      |
| 29.43 | 15/07/2009 | 9.06 | 4.538 | -1.96 |      |      |      |
| 28.37 | 18/08/2009 | 9.17 | 4.580 | -2.15 |      |      |      |
| 26.49 | 20/09/2009 | 9.22 | 4.649 | -2.02 |      |      |      |
| 25.29 | 24/10/2009 | 9.25 | 4.686 | -2.06 |      |      |      |
| 23.52 | 26/11/2009 | 9.26 | 4.623 | -1.98 |      |      |      |
| 25.21 | 01/02/2010 | 9.22 | 4.645 |       |      |      |      |
| 27.48 | 08/03/2010 | 9.09 | 4.482 |       |      |      |      |
| 28.78 | 14/04/2010 | 9.00 | 4.382 |       |      |      |      |
| 29.14 | 22/05/2010 | 9.01 | 4.547 |       |      |      |      |
| 29.26 | 28/06/2010 | 9.02 | 4.571 |       |      |      |      |
| 29.38 | 04/08/2010 | 9.04 | 4.661 |       |      |      |      |
| 27.98 | 11/09/2010 | 9.08 | 4.637 |       |      |      |      |
| 25.75 | 18/10/2010 | 9.15 | 4.557 |       |      |      |      |
| 23.85 | 24/11/2010 | 9.18 | 4.552 |       |      |      |      |
| 25.52 | 01/01/2011 | 9.08 | 4.537 |       |      |      |      |
| 27.79 | 21/02/2011 | 9.02 | 4.651 |       |      |      |      |
| 28.79 | 14/04/2011 | 8.99 | 4.273 |       |      |      |      |
| 29.19 | 05/06/2011 | 9.02 | 4.509 |       |      |      |      |
| 28.54 | 28/07/2011 | 9.09 | 4.765 |       |      |      |      |
| 26.26 | 18/09/2011 | 9.14 | 4.783 |       |      |      |      |
| 25.15 | 10/11/2011 | 9.17 | 4.784 |       |      |      |      |

|       |            |      |       |
|-------|------------|------|-------|
| 25.50 | 01/01/2012 | 9.12 | 4.746 |
| 26.88 | 10/02/2012 | 9.03 | 4.737 |
| 29.36 | 20/03/2012 | 8.98 | 4.777 |
| 29.67 | 28/04/2012 | 8.93 | 4.507 |
| 29.75 | 07/06/2012 | 8.99 | 4.663 |
| 29.55 | 16/07/2012 | 8.99 | 4.447 |
| 28.27 | 26/08/2012 | 9.04 | 4.481 |
| 26.08 | 04/10/2012 | 9.08 | 4.589 |
| 24.38 | 13/11/2012 | 9.12 | 4.643 |
| 23.78 | 23/12/2012 | 9.14 | 4.675 |
| 24.28 | 01/02/2013 | 9.14 | 4.595 |
| 26.11 | 01/03/2013 | 9.08 | 4.515 |
| 28.86 | 01/04/2013 | 9.01 | 4.516 |
| 28.94 | 01/05/2013 | 8.97 | 4.483 |
| 28.91 | 01/06/2013 | 8.95 | 4.340 |
| 29.12 | 01/07/2013 | 8.94 | 4.377 |

---
